# Supplementary material
Source: Springer Nature journal article supplement (https://mijn.bsl.nl/resource/supplementary/13047_2013_592_MOESM2_ESM.pdf/7113170)

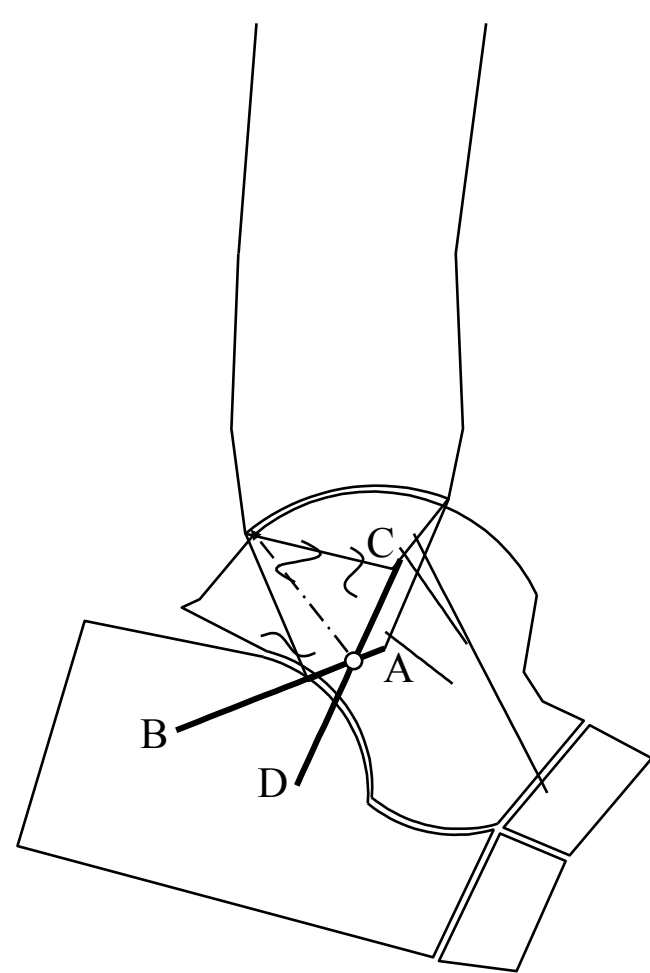

**20° Plantarflexion**

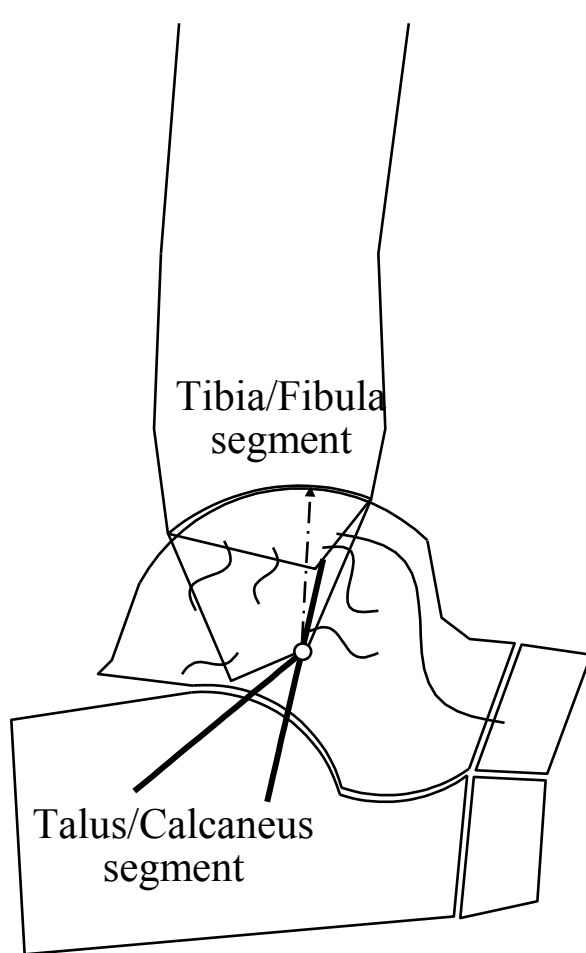

**Neutral**

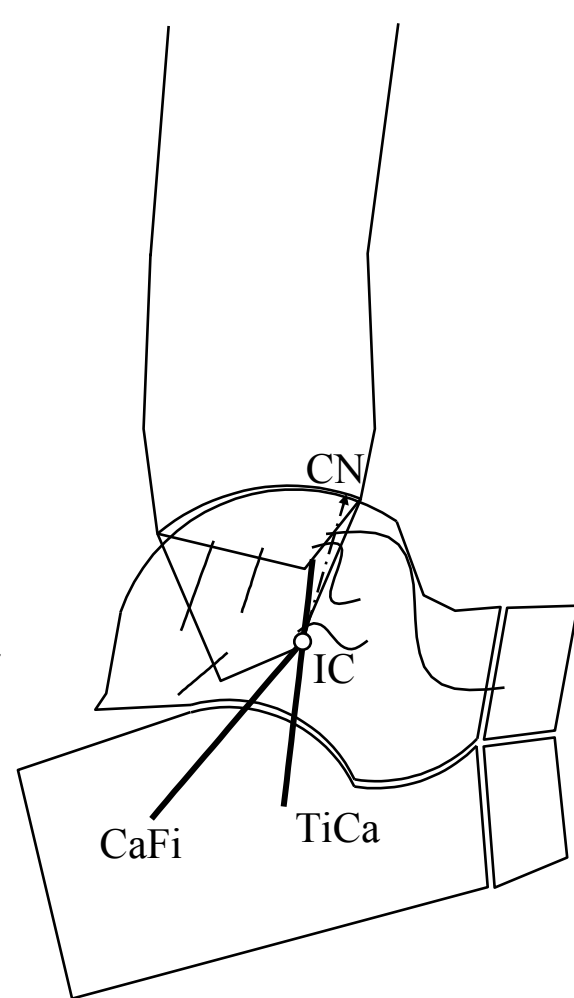

**20° Dorsiflexion**

Supplement: MOESM2 [file 7113170]
